# Supplementary material for: A newly designed isoindigo/thiophene medium-sized molecule containing a π (D–A–D) bridge with unexpected organic photovoltaic performance
Source: Royal Society of Chemistry journal article supplement (doi:10.1039/c9nj04101j), 2019-01-01
Supplement: c9nj04101j1.pdf [file c9nj04101j1.pdf]

**Electronic Supplementary Information (ESI) for New Journal of Chemistry**

**New Designed Isoindigo/Thiophene Medium-sized Molecule Containing  $\pi$  (D-A-D) Bridge with Unexpected Organic Photovoltaic Performance**

Mohamed Shaker<sup>\*a</sup>, Morad M. El-Hendawy<sup>b</sup>, Byoungwook Park<sup>c</sup>, Kwanghee Lee<sup>c</sup>

- a. Photofunctional Organic Chemistry Laboratory, Graduate School of Materials Science, Nara Institute of Science and Technology, 8916-5 Takayama-cho, Ikoma, Nara 630-0192, Japan. Permanent Address: Chemistry Department, Faculty of Science, Tanta University, Tanta 31527, Egypt.  
E-mail: *moh.shaker\_82@yahoo.com*
- b. Chemistry Department, Faculty of Science, The New Valley University, Kharga 72511, Egypt
- c. Organic Semiconductors & Optoelectronics Laboratory, School of Materials Science and Engineering, Gwangju Institute of Science and Technology, Gwangju 500-712, Korea South.

$^1\text{H}$  and  $^{13}\text{C}$  NMR spectra

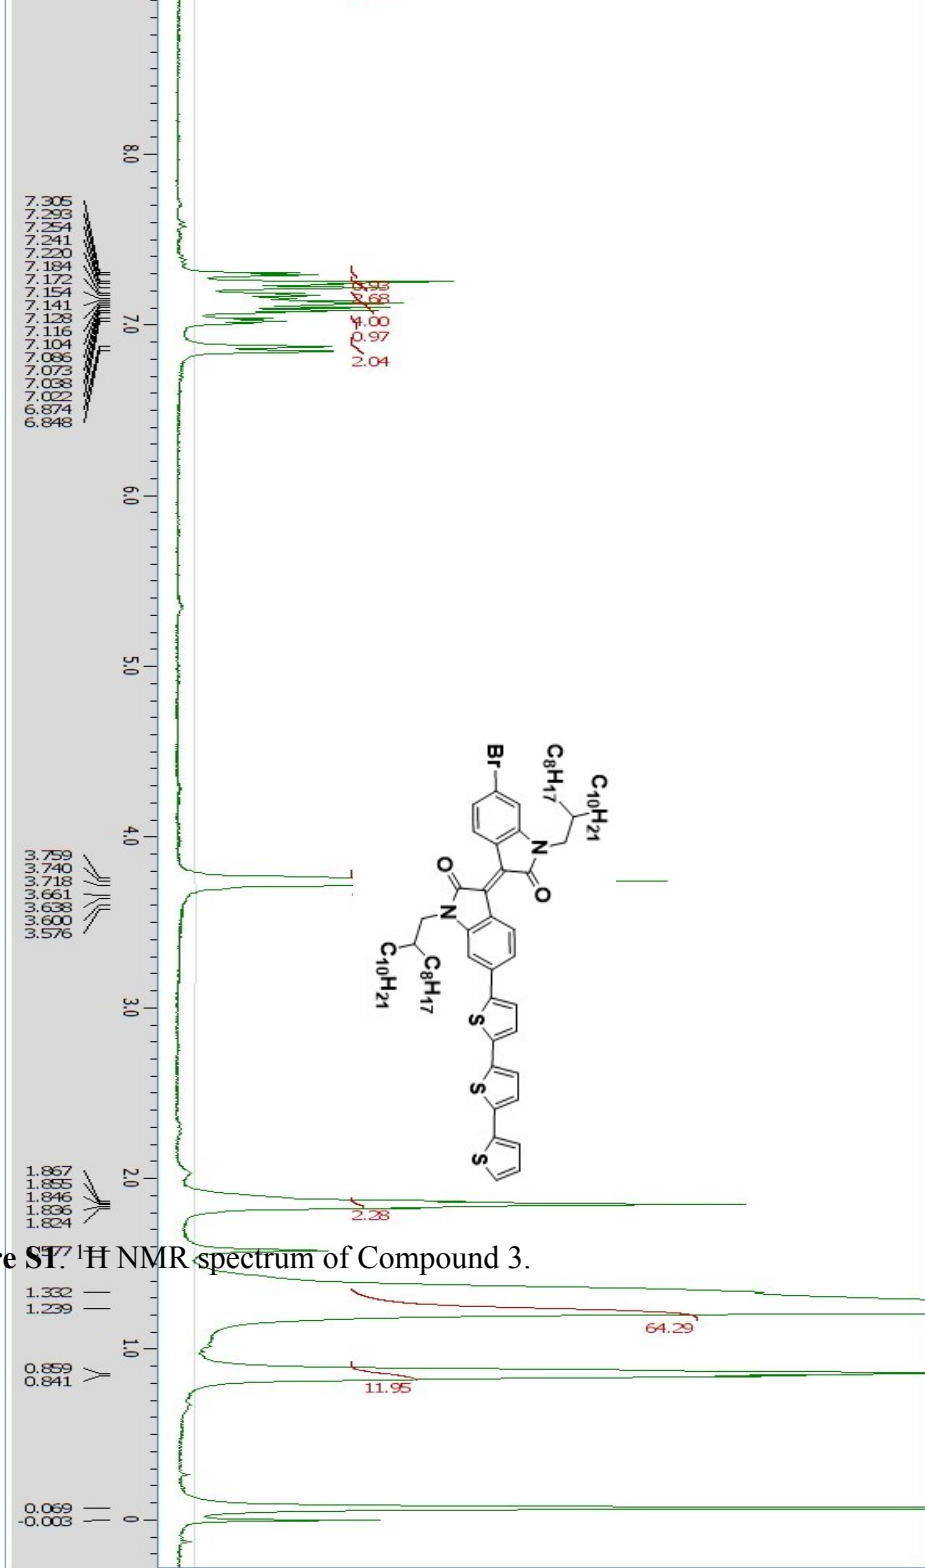

Figure S1.  $^1\text{H}$  NMR spectrum of Compound 3.

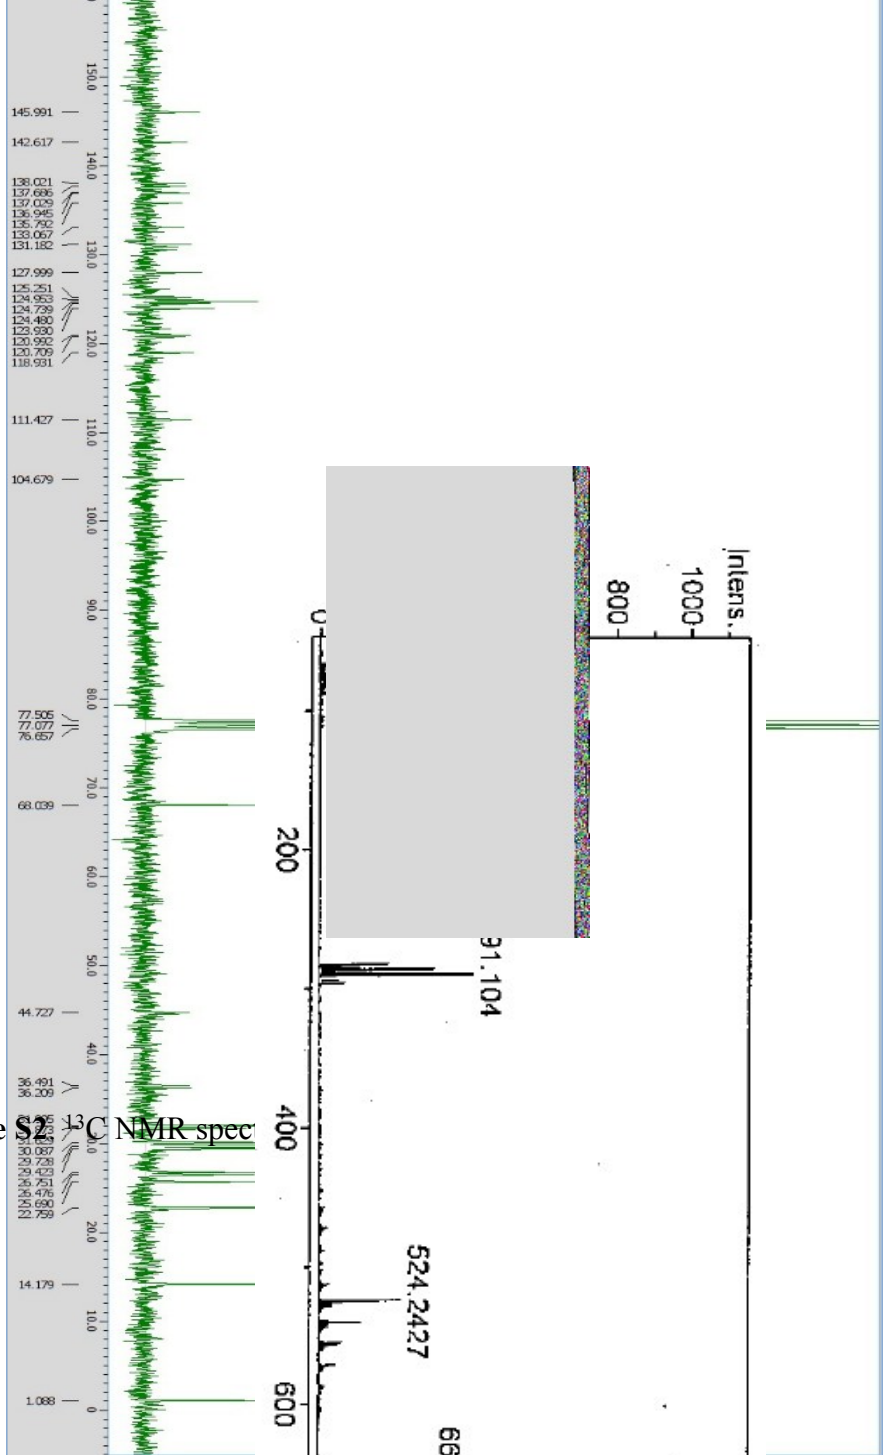

**Figure S2.**  $^{13}\text{C}$  NMR spec

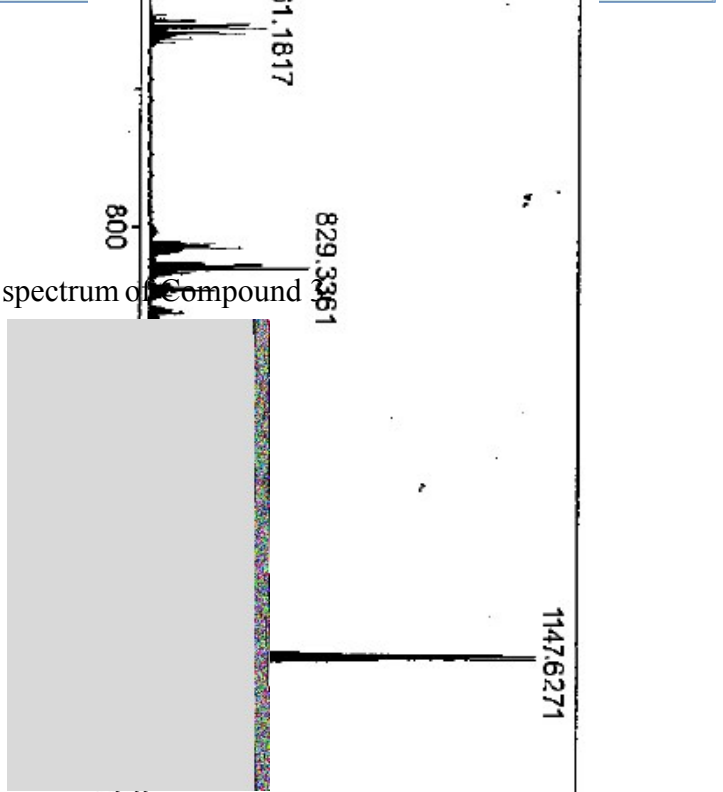

**Figure S3.** Mass spectrum of Compound

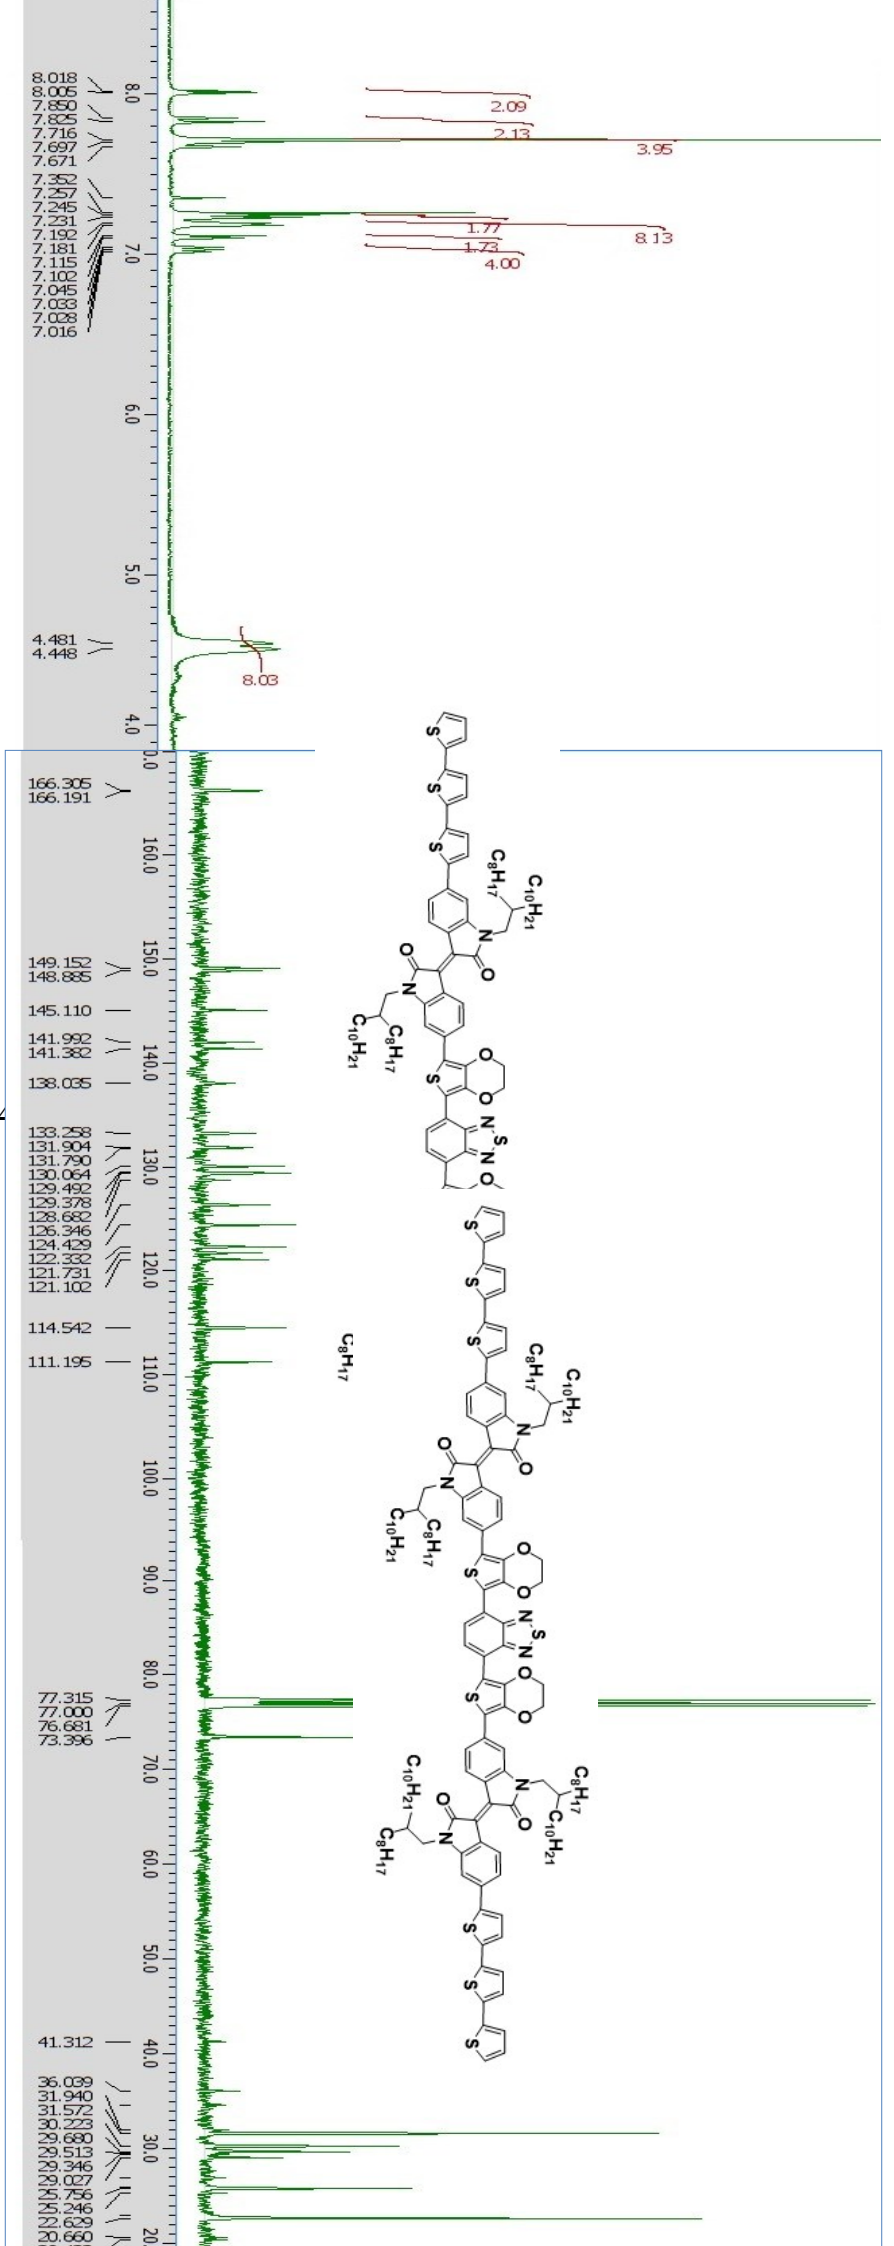

Figure S4

**Figure S5.**  $^{13}\text{C}$  NMR spectrum of Compound 5.

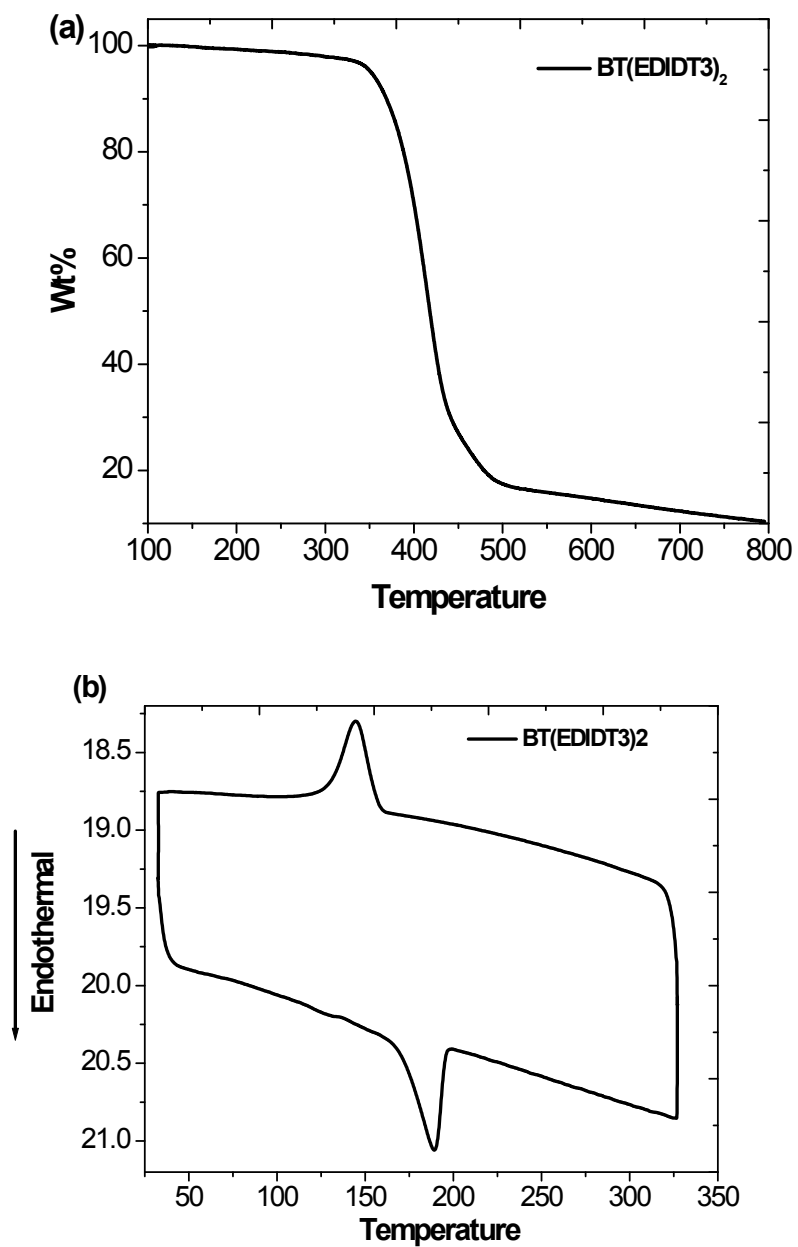

**Figure S6.** (a) TGA thermogram of BT(EDIDT3)<sub>2</sub> and (b) differential scanning calorimetry (DSC) under a nitrogen atmosphere at a heating rate of 10<sup>0</sup>C min<sup>-1</sup>.

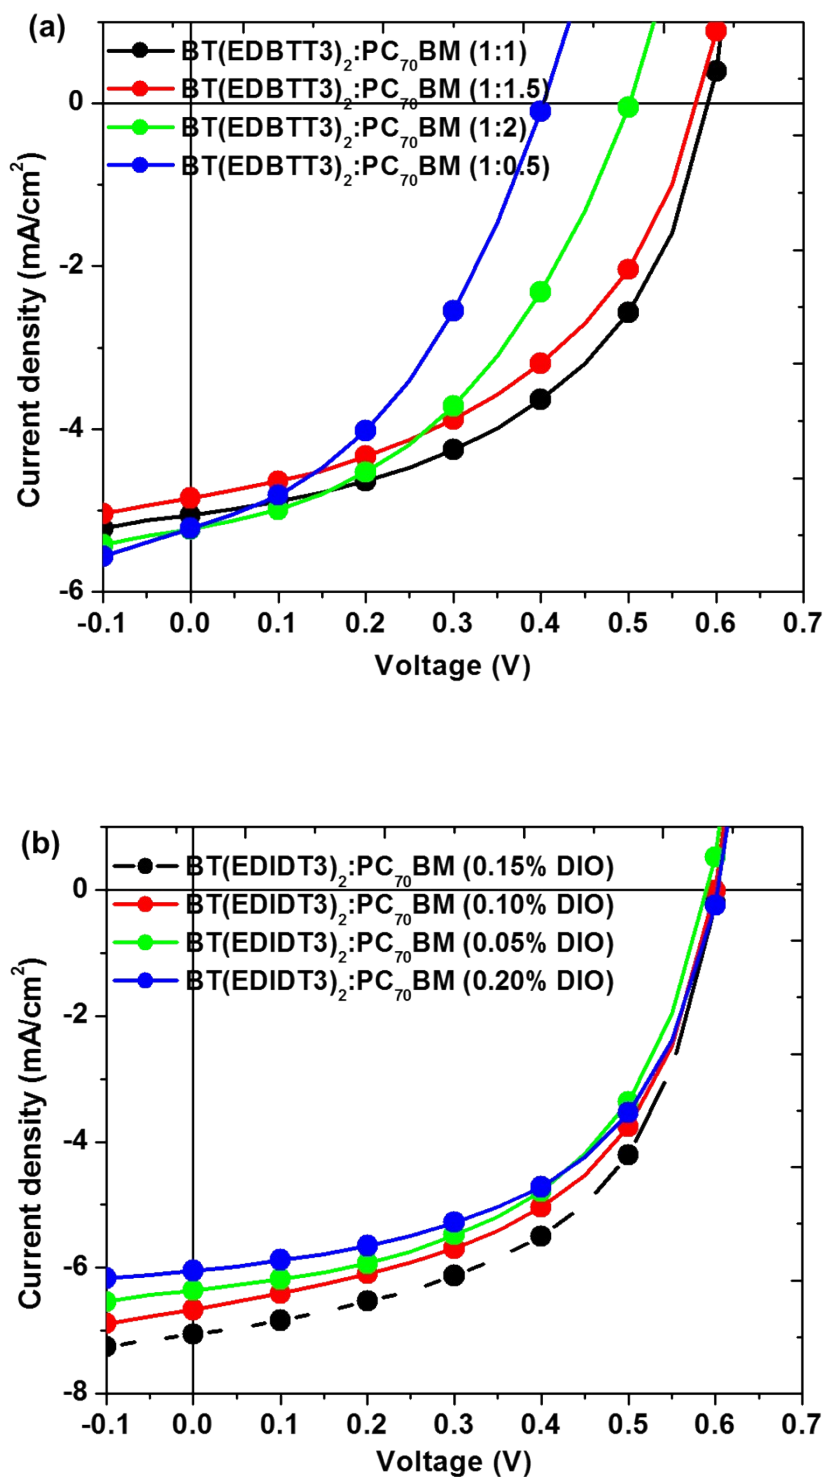

**Fig. S7.** (a) Current density versus voltage characteristics of ITO/PEDOT:PSS/BT(EDIDT3)<sub>2</sub>:PC<sub>70</sub>BM/Ca/Al organic photovoltaic devices with different donor and acceptor ratio without DIO. (b) Current density versus voltage characteristics of TO/PEDOT:PSS/BT(EDIDT3)<sub>2</sub>:PC<sub>70</sub>BM/Ca/Al (1:1) organic photovoltaic devices with different DIO content.

**Table S1.** Photovoltaic performance of ITO/PEDOT:PSS/ BT(EDIDT3)<sub>2</sub>:PC<sub>70</sub>BM/Ca/Al organic photovoltaic devices with different donor and acceptor ratio (without DIO) and DIO content. The BT(EDIDT3)<sub>2</sub> and PC<sub>70</sub>BM ratio was fixed with 1:1 in photovoltaic devices with different DIO content

| (BT(EDIDT3) <sub>2</sub> :PC <sub>70</sub> BM<br>(ratio))              | $J_{sc}$<br>(mA/cm <sup>2</sup> ) | $V_{oc}$<br>(V) | FF<br>(%) | PCE<br>(%) |
|------------------------------------------------------------------------|-----------------------------------|-----------------|-----------|------------|
| (1:1)                                                                  | 0.59                              | 5.06            | 0.49      | 1.45       |
| (1:1.5)                                                                | 0.58                              | 4.85            | 0.46      | 1.28       |
| (1:2)                                                                  | 0.5                               | 5.23            | 0.42      | 1.12       |
| (1:0.5)                                                                | 0.4                               | 5.22            | 0.4       | 0.85       |
| (BT(EDIDT3) <sub>2</sub> :PC <sub>70</sub> BM (1:1)<br>DIO content (%) |                                   |                 |           |            |
| 0.15                                                                   | 0.6                               | 7.06            | 0.53      | 2.25       |
| 0.10                                                                   | 0.6                               | 6.67            | 0.51      | 2.04       |
| 0.05                                                                   | 0.59                              | 6.36            | 0.51      | 1.91       |
| 0.20                                                                   | 0.6                               | 6.05            | 0.52      | 1.91       |

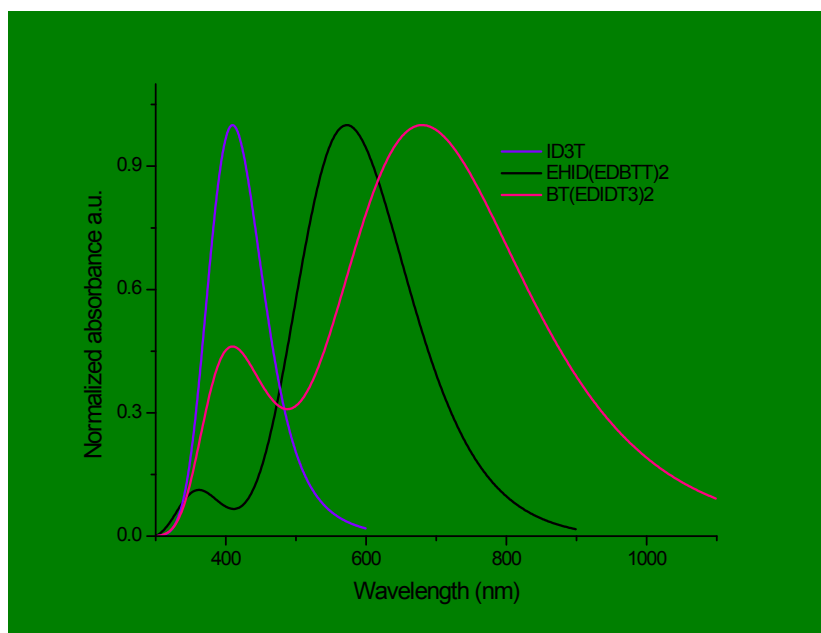

**Figure S8.** Simulated UV-Vis absorption spectra of the title compounds in CHCl<sub>3</sub> by TD-DFT/CAM-B3LYP/6-31G(d,p).

**Table S2.** Excited-state vertical transition energies (Cal  $\lambda_{\max}$ , nm), oscillator strengths and main electronic configuration of the first excited state and their percentage contribution (C%) of the title compounds using TD- CAM-B3LYP/6-31G(d,p)

|                     | Cal $\lambda_{\max}$<br>(nm) | $f$  | Main configuration                       | C%         | Exp $\lambda_{\max}$<br>(nm) |
|---------------------|------------------------------|------|------------------------------------------|------------|------------------------------|
| <b>BT(EDIDT3)2</b>  | 679                          | 2.60 | H $\rightarrow$ L; H-1 $\rightarrow$ L+1 | 0.44; 0.24 | 662                          |
| <b>EHID(EDBTT)2</b> | 571                          | 2.11 | H $\rightarrow$ L                        | 0.72       | 568                          |
| <b>IDT3</b>         | 407                          | 1.66 | H $\rightarrow$ L; H-2 $\rightarrow$ L   | 0.68; 0.25 | 401                          |
